# Supplementary material
Source: HighWire-hosted journal article supplement (https://rmdopen.bmj.com/content/8/1/e001697)
Supplement: inline-supplementary-material-1 [file inline-supplementary-material-1.pdf]

Supplementary Table S1: Comparison between patients with paradoxical articular manifestation during the first two years of anti-TNF treatment and those without new inflammatory articular manifestation during anti-TNF therapy and who had a minimum of two consecutive years of anti-TNF treatment

|                                                                         | Patients with paradoxical articular manifestation, n= 9 (%) | Patients without new inflammatory articular manifestation, n = 187 (%) | p     |
|-------------------------------------------------------------------------|-------------------------------------------------------------|------------------------------------------------------------------------|-------|
| Female gender, n (%)                                                    | 6 (66.7)                                                    | 77 (41.2)                                                              | 0.172 |
| Male gender, n (%)                                                      | 3 (33.3)                                                    | 110 (58.8)                                                             | 0.172 |
| Age (years), mean (SD)                                                  | 31.1 (7.9)                                                  | 33.4 (11.5)                                                            | 0.840 |
| Inflammatory bowel disease (IBD)                                        |                                                             |                                                                        |       |
| Crohn disease (CD), n (%)                                               | 6 (66.6)                                                    | 126 (67.4)                                                             | 1     |
| Ulcerative Colitis (UC), n (%)                                          | 3 (33.3)                                                    | 57 (30.5)                                                              | 1     |
| Indeterminate colitis, n (%)                                            | 0 (0)                                                       | 4 (2.1)                                                                | 1     |
| Disease duration (years), mean                                          | 4.8 (4.4)                                                   | 4.8 (4.8)                                                              | 0.795 |
| Psoriasis, n (%)                                                        | 0 (0)                                                       | 2 (1.1)                                                                | 1     |
| Paradoxical psoriasis, n (%)                                            | 1 (10)                                                      | 12 (6.4)                                                               | 0.468 |
| Uveitis, n (%)                                                          | 0 (0)                                                       | 1 (0.5)                                                                | 1     |
| Number of anti-TNF $\alpha$ received, mean (SD)                         | 1.4 (0.6)                                                   | 1.4 (0.5)                                                              | 0.919 |
| Immunosuppressive therapy at the beginning of anti-TNF $\alpha$ , n (%) |                                                             |                                                                        |       |
| Azathioprine, n (%)                                                     | 8 (88.9)                                                    | 113 (60.4)                                                             | 0.157 |
| Methotrexate, n (%)                                                     | 7 (77.8)                                                    | 94 (50.3)                                                              | 0.171 |
| Methotrexate, n (%)                                                     | 0 (0)                                                       | 7 (3.7)                                                                | 1     |
| Purinethol, n (%)                                                       | 1 (11.1)                                                    | 11 (5.9)                                                               | 0.441 |
| Others, n (%)                                                           | 0 (0)                                                       | 1 (0.5)                                                                | 1     |
